# Supplementary material
Source: publisher figshare collection journal article supplement (https://acs.figshare.com/ndownloader/files/9624877)
Supplement: Supplementary file 1 [file 9624877]

## Supporting Information

### Femtosecond Laser Trapping Dynamics of Nanoparticles: A Single Transient Assembly Formation Leading to Their Directional Ejection

Wei-Yi Chiang,<sup>1,3</sup> Anwar Usman,<sup>2,\*</sup> Teruki Sugiyama,<sup>1,4\*</sup> Johan Hofkens,<sup>3,\*</sup> Hiroshi Masuhara<sup>1,\*</sup>

<sup>1</sup>*Department of Applied Chemistry, College of Science, National Chiao Tung University, 1001 Ta Hsueh Rd., Hsinchu 30010, Taiwan,*

<sup>2</sup>*Department of Chemistry, Faculty of Science, Universiti Brunei Darussalam, Jalan Tungku Link, Gadong BE1410, Negara Brunei Darussalam*

<sup>3</sup>*Single Molecule Unit, Department of Chemistry, Katholieke Universiteit Leuven, Celestijnenlaan 200F, 3001 Heverlee, België*

<sup>4</sup>*Graduate School of Materials Science, Nara Institute of Science and Technology, 8916-5 Takaya-ma-cho, Ikoma, Nara 630-0192, Japan*

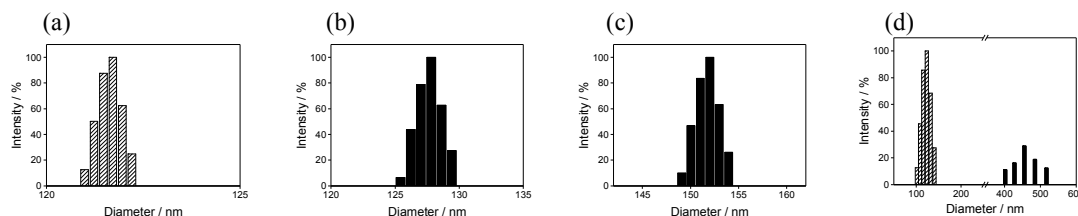

Fig. S1. The size distribution of (a) silica NPs-(100), (b) (OTES)-silica NPs-(100→130), (c) (OTES)-silica NPs-(100→150), and (d) (OTES)-silica NPs-(100→450). In Fig. (a) we found that the real size of NPs-(100) is about 120 nm, but here we write silica NPs-(100) as they are commercially labeled. In Fig. (d), two size distributions were found around 120 and 450 nm, where 120 nm is the original silica NPs-(100). Another one is ascribed to silanization of silica NPs-(100). After filtering out, some of (OTES)-silica NPs-(100→450) were removed because the pore size of the filter is close to their size, leading to the intensity is lower than that of Silica NPs-(100). The trapping experiments were carried out after the filtration. The unreacted silica NPs remaining in solution do not show the trapping and ejection behavior, the transient sphere-like swarm is ascribed to silanized silica NPs with the size of 450 nm.
